# Supplementary material
Source: MDPI journal article supplement (https://www.mdpi.com/2076-3271/9/3/57)
Supplement: s1 [file s1]

| Patient | Age | Gender | Lateralit<br>y | Locatio<br>n | AJCC<br>Stage | Breslow<br>Thickness<br>(mm) | Ulcerat<br>ion | Mitoses<br>(per mm <sup>2</sup> ) | Histolo<br>gy | Year of<br>Surgery | SLNB         | Size of<br>Largest<br>SLNB<br>Metastasis<br>(mm) | Lymph Node<br>Dissection | Adjuva<br>nt<br>Therapy                             | Site of<br>Initial<br>Recurrence | RFS<br>(months) | Status                      |
|---------|-----|--------|----------------|--------------|---------------|------------------------------|----------------|-----------------------------------|---------------|--------------------|--------------|--------------------------------------------------|--------------------------|-----------------------------------------------------|----------------------------------|-----------------|-----------------------------|
| 1       | 70  | F      | Left           | Finger       | 0             |                              |                |                                   | MIS           | 2017               | N/A          |                                                  | N/A                      |                                                     |                                  |                 | NED                         |
| 2       | 18  | F      | Right          | Finger       | 0             |                              |                |                                   | MIS           | 2017               | N/A          |                                                  | N/A                      |                                                     |                                  |                 | NED                         |
| 3       | 86  | M      | Right          | Toe          | 0             |                              |                |                                   | MIS           | 2016               | N/A          |                                                  | N/A                      |                                                     |                                  |                 | NED                         |
| 4       | 52  | M      | Right          | Finger       | IA            | 0.8                          | NR             | NR                                | AL            | 2006               | Negati<br>ve |                                                  | N/A                      |                                                     |                                  |                 | NED                         |
| 5       | 61  | M      | Right          | Toe          | IB            | 1.2                          | No             | 0                                 | AL            | 2018               | Negati<br>ve |                                                  | N/A                      |                                                     |                                  |                 | NED                         |
| 6       | 77  | F      | Right          | Finger       | IIA           | 3.8                          | No             | 1                                 | NR            | 2008               | Negati<br>ve |                                                  | N/A                      |                                                     | In-transit                       | 7               | DOD                         |
| 7       | 74  | M      | Left           | Toe          | IIB           | 3.2                          | Yes            | 7                                 | AL            | 2004               | Negati<br>ve |                                                  | N/A                      |                                                     |                                  |                 | NED                         |
| 8       | 61  | M      | Left           | Finger       | IIB           | 5.5                          | No             | 8                                 | AL            | 2017               | Negati<br>ve |                                                  | N/A                      |                                                     | In-transit                       | 14              | NED                         |
| 9       | 89  | M      | Right          | Toe          | IIB           | 3.7                          | Yes            | 5                                 | AL            | 2016               | Negati<br>ve |                                                  | N/A                      |                                                     |                                  |                 | NED                         |
| 10      | 56  | F      | Left           | Toe          | IIB           | 2.9                          | Yes            | 6                                 | AL            | 2015               | Negati<br>ve |                                                  | N/A                      |                                                     |                                  |                 | NED                         |
| 11      | 74  | M      | Right          | Toe          | IIC           | 4.5                          | Yes            | NR                                | NR            | 2002               | Negati<br>ve |                                                  | N/A                      | Clinical<br>Trial -<br>Vaccine                      | In-transit,<br>Nodal             | 73              | Dead<br>(Unknow<br>n Cause) |
| 12      | 75  | M      | Left           | Finger       | IIIA          | 0.4                          | No             | <1                                | AL            | 2016               | Positiv<br>e | < 1                                              | N/A                      | None                                                |                                  |                 | NED                         |
| 13      | 58  | F      | Left           | Toe          | IIIC          | 4.1                          | Yes            | 3                                 | AL            | 2016               | Positiv<br>e | 1.7                                              | Positive                 | Clinical<br>Trial -<br>Pembrol<br>izumab            |                                  |                 | NED                         |
| 14      | 74  | M      | Left           | Toe          | IIIC          | 2.1                          | Yes            | 0                                 | SS            | 2012               | Positiv<br>e | 1.0                                              | Negative                 | Patient<br>Decline<br>d                             | Distant<br>Metastasis            | 12              | DOD                         |
| 15      | 20  | F      | Left           | Toe          | IIIC          | 3.0                          | Yes            | NR                                | Nodular       | 2005               | Positiv<br>e | NR                                               | Negative                 | Interfero<br>n alpha                                |                                  |                 | NED                         |
| 16      | 54  | M      | Right          | Toe          | IIIC          | 4.0                          | Yes            | 6                                 | AL            | 2014               | Positiv<br>e | 3.0                                              | N/A                      | Ipilimu<br>mab                                      | Distant<br>Metastasis            | 31              | DOD                         |
| 17      | 66  | M      | Left           | Finger       | IIIC          | 4.0                          | NR             | NR                                | Nodular       | 2001               | N/A          |                                                  | Positive                 | Clinical<br>Trial -<br>Dacarba<br>zine,<br>Cisplati | Distant<br>Metastasis            | 27              | DOD                         |

|    |    |   |       |        |      |     |     |    |         |      |              | n,<br>Vinblast<br>ine, IL-2,<br>Interfero<br>n |          |                         |                       |    |                             |
|----|----|---|-------|--------|------|-----|-----|----|---------|------|--------------|------------------------------------------------|----------|-------------------------|-----------------------|----|-----------------------------|
| 18 | 61 | F | Right | Toe    | IIIC | 15  | Yes | 12 | AL      | 2017 | Positive     | 13                                             | Positive | NR                      | Nodal                 | 10 | AWD                         |
| 19 | 51 | M | Left  | Toe    | IIID | 30  | yes | NR | Nodular | 2004 | N/A          |                                                | Positive | Interfero<br>n alpha    | Distant<br>Metastasis | 6  | DOD                         |
| 20 | 59 | M | Left  | Toe    | IIIC | 2.7 | yes | NR | NR      | 2004 | N/A          |                                                | Positive | Dacarba<br>zine         | Distant<br>Metastasis | 41 | DOD                         |
| 21 | 77 | M | Left  | Finger | III  | NR  | NR  | NR | NR      | 2013 | N/A          |                                                | Positive | Radioth<br>erapy        | In-transit            | 1  | DOD                         |
| 22 | 84 | F | Left  | Toe    | IIID | 6.0 | Yes | >1 | NR      | 2013 | N/A          |                                                | Positive | Patient<br>Decline<br>d |                       |    | NED                         |
| 23 | 81 | F | Left  | Toe    | III  | NR  | NR  | NR | NR      | 2012 | N/A          |                                                | Positive | Patient<br>Decline<br>d | Nodal                 | 7  | DOD                         |
| 24 | 69 | F | Right | Toe    | NR   | 1.5 | Yes | 4  | NR      | 2012 | Negati<br>ve |                                                | N/A      |                         | Distant<br>Metastasis | 10 | DOD                         |
| 25 | 76 | M | Left  | Toe    | NR   | 2.5 | NR  | NR | NR      | 2008 | NR           |                                                | NR       |                         | Nodal                 | NR | Dead<br>(Unknow<br>n Cause) |

MIS: melanoma in situ, AL: acral lentiginous, SS: superficial spreading, NED: no evidence of disease, DOD: died of disease, AWD: alive with disease, SLNB: sentinel lymph node biopsy, NR: not recorded, N/A: not applicable.
